# Supplementary material for: Identification of immune related cells and crucial genes in the peripheral blood of ankylosing spondylitis by integrated bioinformatics analysis
Source: PubMed Central journal article supplement (PMC8432305; doi:10.7717/peerj.12125), 2021-09-07
Supplement: peerj-09-12125-s012.pdf [file peerj-09-12125-s012.pdf]

| Input Sample | B cells naive | B cells memory | Plasma cells | T cells CD8 naive | T cells CD4 memory resting | T cells CD4T memory activated | T cells CD4T follicular helper | T cells regulatory (Tregs) | T cells gamma delta | NK cells resting | NK cells activated | Monocytes | Macrophages M0 | Macrophages M1 | Macrophages M2 | Dendritic cells resting | Dendritic cells activated | Mast cells resting | Mast cells activated | Eosinophils | Neutrophils | P-value | Pearson Correlation | RMSE |
|--------------|---------------|----------------|--------------|-------------------|----------------------------|-------------------------------|--------------------------------|----------------------------|---------------------|------------------|--------------------|-----------|----------------|----------------|----------------|-------------------------|---------------------------|--------------------|----------------------|-------------|-------------|---------|---------------------|------|
| GSM16684     | 0.007         | 0.026          | 0.001        | 0.115             | 0.038                      | 0.079                         | 0.074                          | 0.028                      | 0.138               | 0.047            | 0.035              | 0.139     | 0.04           | 0.04           | 0.04           | 0.005                   | 0.004                     | 0.009              | 0.000                | 0.224       | 0.000       | 0.726   | 0.694               |      |
| GSM16685     | 0.007         | 0.045          | 0.001        | 0.249             | 0.095                      | 0.078                         | 0.074                          | 0.027                      | 0.08                | 0.047            | 0.035              | 0.139     | 0.04           | 0.04           | 0.04           | 0.005                   | 0.004                     | 0.009              | 0.000                | 0.224       | 0.000       | 0.726   | 0.700               |      |
| GSM16686     | 0.007         | 0.041          | 0.001        | 0.212             | 0.08                       | 0.078                         | 0.074                          | 0.027                      | 0.08                | 0.047            | 0.035              | 0.139     | 0.04           | 0.04           | 0.04           | 0.005                   | 0.004                     | 0.009              | 0.000                | 0.224       | 0.000       | 0.716   | 0.714               |      |
| GSM16687     | 0.007         | 0.082          | 0.001        | 0.172             | 0.114                      | 0.078                         | 0.074                          | 0.027                      | 0.08                | 0.047            | 0.035              | 0.139     | 0.04           | 0.04           | 0.04           | 0.005                   | 0.004                     | 0.009              | 0.000                | 0.224       | 0.000       | 0.698   | 0.727               |      |
| GSM16688     | 0.015         | 0.057          | 0.001        | 0.145             | 0.058                      | 0.163                         | 0.045                          | 0.008                      | 0.066               | 0.055            | 0.105              | 0.225     | 0.04           | 0.04           | 0.04           | 0.007                   | 0.007                     | 0.007              | 0.000                | 0.05        | 0.000       | 0.725   | 0.705               |      |
| GSM16689     | 0.009         | 0.026          | 0.001        | 0.073             | 0.116                      | 0.137                         | 0.022                          | 0.022                      | 0.02                | 0.084            | 0.02               | 0.03      | 0.16           | 0.04           | 0.04           | 0.007                   | 0.022                     | 0.034              | 0.000                | 0.267       | 0.000       | 0.705   | 0.718               |      |
| GSM16690     | 0.009         | 0.019          | 0.001        | 0.022             | 0.112                      | 0.04                          | 0.021                          | 0.019                      | 0.015               | 0.19             | 0.02               | 0.151     | 0.028          | 0.04           | 0.04           | 0.004                   | 0.004                     | 0.008              | 0.000                | 0.268       | 0.000       | 0.699   | 0.718               |      |
| GSM16691     | 0.001         | 0.019          | 0.001        | 0.119             | 0.071                      | 0.047                         | 0.009                          | 0.039                      | 0.074               | 0.007            | 0.163              | 0.066     | 0.04           | 0.04           | 0.04           | 0.003                   | 0.003                     | 0.035              | 0.000                | 0.268       | 0.000       | 0.725   | 0.694               |      |
| GSM16692     | 0.007         | 0.077          | 0.001        | 0.148             | 0.156                      | 0.072                         | 0.013                          | 0.034                      | 0.004               | 0.007            | 0.033              | 0.25      | 0.048          | 0.04           | 0.04           | 0.002                   | 0.012                     | 0.011              | 0.000                | 0.135       | 0.000       | 0.706   | 0.728               |      |
| GSM16693     | 0.009         | 0.049          | 0.001        | 0.12              | 0.039                      | 0.146                         | 0.019                          | 0.036                      | 0.036               | 0.073            | 0.224              | 0.013     | 0.04           | 0.04           | 0.04           | 0.004                   | 0.004                     | 0.011              | 0.000                | 0.24        | 0.000       | 0.747   | 0.682               |      |
| GSM16694     | 0.016         | 0.032          | 0.001        | 0.131             | 0.038                      | 0.119                         | 0.047                          | 0.027                      | 0.033               | 0.039            | 0.075              | 0.206     | 0.04           | 0.04           | 0.04           | 0.006                   | 0.006                     | 0.011              | 0.000                | 0.22        | 0.000       | 0.747   | 0.685               |      |
| GSM16695     | 0.013         | 0.029          | 0.001        | 0.147             | 0.035                      | 0.058                         | 0.019                          | 0.133                      | 0.03                | 0.137            | 0.095              | 0.159     | 0.027          | 0.04           | 0.04           | 0.007                   | 0.007                     | 0.007              | 0.000                | 0.166       | 0.000       | 0.684   | 0.736               |      |
| GSM16696     | 0.016         | 0.016          | 0.001        | 0.219             | 0.069                      | 0.079                         | 0.097                          | 0.021                      | 0.014               | 0.052            | 0.158              | 0.003     | 0.04           | 0.04           | 0.04           | 0.001                   | 0.001                     | 0.007              | 0.000                | 0.148       | 0.000       | 0.731   | 0.696               |      |
| GSM16697     | 0.003         | 0.03           | 0.001        | 0.191             | 0.058                      | 0.034                         | 0.025                          | 0.048                      | 0.014               | 0.124            | 0.034              | 0.254     | 0.027          | 0.04           | 0.04           | 0.004                   | 0.003                     | 0.007              | 0.000                | 0.168       | 0.000       | 0.714   | 0.713               |      |
| GSM16698     | 0.003         | 0.039          | 0.001        | 0.267             | 0.107                      | 0.079                         | 0.019                          | 0.078                      | 0.055               | 0.089            | 0.162              | 0.017     | 0.04           | 0.04           | 0.04           | 0.006                   | 0.006                     | 0.002              | 0.000                | 0.159       | 0.000       | 0.687   | 0.734               |      |
| GSM16699     | 0.001         | 0.041          | 0.001        | 0.133             | 0.092                      | 0.079                         | 0.055                          | 0.031                      | 0.017               | 0.071            | 0.079              | 0.156     | 0.052          | 0.04           | 0.04           | 0.002                   | 0.002                     | 0.006              | 0.000                | 0.261       | 0.000       | 0.692   | 0.729               |      |
| GSM16700     | 0.003         | 0.015          | 0.001        | 0.106             | 0.11                       | 0.079                         | 0.027                          | 0.027                      | 0.061               | 0.049            | 0.234              | 0.019     | 0.04           | 0.04           | 0.04           | 0.002                   | 0.012                     | 0.016              | 0.000                | 0.269       | 0.000       | 0.744   | 0.679               |      |
| GSM16701     | 0.002         | 0.02           | 0.001        | 0.104             | 0.124                      | 0.079                         | 0.058                          | 0.012                      | 0.068               | 0.037            | 0.187              | 0.059     | 0.04           | 0.04           | 0.04           | 0.001                   | 0.001                     | 0.007              | 0.000                | 0.269       | 0.000       | 0.734   | 0.689               |      |
| GSM16702     | 0.001         | 0.015          | 0.001        | 0.164             | 0.125                      | 0.079                         | 0.097                          | 0.001                      | 0.142               | 0.013            | 0.183              | 0.019     | 0.04           | 0.04           | 0.04           | 0.007                   | 0.007                     | 0.011              | 0.000                | 0.224       | 0.000       | 0.713   | 0.713               |      |
| GSM16703     | 0.001         | 0.034          | 0.001        | 0.096             | 0.086                      | 0.163                         | 0.023                          | 0.032                      | 0.031               | 0.05             | 0.253              | 0.025     | 0.04           | 0.04           | 0.04           | 0.008                   | 0.008                     | 0.001              | 0.000                | 0.198       | 0.000       | 0.720   | 0.709               |      |
| GSM16704     | 0.001         | 0.054          | 0.001        | 0.057             | 0.119                      | 0.09                          | 0.019                          | 0.002                      | 0.021               | 0.073            | 0.009              | 0.166     | 0.032          | 0.04           | 0.04           | 0.002                   | 0.012                     | 0.016              | 0.000                | 0.268       | 0.000       | 0.729   | 0.689               |      |
| GSM16705     | 0.01          | 0.018          | 0.001        | 0.045             | 0.136                      | 0.054                         | 0.079                          | 0.004                      | 0.04                | 0.019            | 0.025              | 0.203     | 0.03           | 0.04           | 0.04           | 0.005                   | 0.018                     | 0.016              | 0.000                | 0.217       | 0.000       | 0.707   | 0.711               |      |
| GSM16706     | 0.012         | 0.034          | 0.001        | 0.136             | 0.047                      | 0.223                         | 0.019                          | 0.029                      | 0.036               | 0.237            | 0.013              | 0.06      | 0.04           | 0.04           | 0.04           | 0.003                   | 0.003                     | 0.001              | 0.000                | 0.21        | 0.000       | 0.728   | 0.700               |      |
| GSM16707     | 0.001         | 0.011          | 0.001        | 0.025             | 0.068                      | 0.197                         | 0.011                          | 0.023                      | 0.091               | 0.036            | 0.25               | 0.06      | 0.04           | 0.04           | 0.04           | 0.003                   | 0.013                     | 0.016              | 0.000                | 0.252       | 0.000       | 0.707   | 0.714               |      |
| GSM16708     | 0.047         | 0.038          | 0.001        | 0.208             | 0.025                      | 0.122                         | 0.022                          | 0.017                      | 0.037               | 0.016            | 0.041              | 0.239     | 0.04           | 0.04           | 0.04           | 0.009                   | 0.009                     | 0.004              | 0.000                | 0.260       | 0.000       | 0.668   | 0.745               |      |
| GSM16709     | 0.026         | 0.015          | 0.001        | 0.056             | 0.053                      | 0.048                         | 0.026                          | 0.039                      | 0.014               | 0.08             | 0.079              | 0.031     | 0.04           | 0.04           | 0.04           | 0.009                   | 0.009                     | 0.004              | 0.000                | 0.214       | 0.000       | 0.714   | 0.707               |      |
| GSM16710     | 0.015         | 0.015          | 0.001        | 0.162             | 0.07                       | 0.125                         | 0.027                          | 0.03                       | 0.068               | 0.036            | 0.201              | 0.017     | 0.04           | 0.04           | 0.04           | 0.003                   | 0.003                     | 0.004              | 0.000                | 0.229       | 0.000       | 0.661   | 0.753               |      |
| GSM16711     | 0.028         | 0.007          | 0.001        | 0.087             | 0.036                      | 0.134                         | 0.043                          | 0.007                      | 0.079               | 0.07             | 0.268              | 0.02      | 0.04           | 0.04           | 0.04           | 0.033                   | 0.033                     | 0.027              | 0.000                | 0.229       | 0.000       | 0.661   | 0.753               |      |
| GSM16712     | 0.002         | 0.026          | 0.001        | 0.132             | 0.02                       | 0.176                         | 0.016                          | 0.061                      | 0.064               | 0.033            | 0.241              | 0.024     | 0.04           | 0.04           | 0.04           | 0.006                   | 0.006                     | 0.002              | 0.000                | 0.2         | 0.000       | 0.688   | 0.732               |      |
| GSM16713     | 0.014         | 0.01           | 0.001        | 0.121             | 0.067                      | 0.079                         | 0.045                          | 0.027                      | 0.053               | 0.07             | 0.26               | 0.022     | 0.04           | 0.04           | 0.04           | 0.015                   | 0.015                     | 0.047              | 0.000                | 0.229       | 0.000       | 0.723   | 0.694               |      |
| GSM16714     | 0.037         | 0.037          | 0.001        | 0.179             | 0.045                      | 0.182                         | 0.03                           | 0.047                      | 0.009               | 0.036            | 0.184              | 0.007     | 0.04           | 0.04           | 0.04           | 0.004                   | 0.004                     | 0.007              | 0.000                | 0.24        | 0.000       | 0.655   | 0.750               |      |
| GSM16715     | 0.013         | 0.013          | 0.001        | 0.067             | 0.142                      | 0.067                         | 0.067                          | 0.038                      | 0.067               | 0.1              | 0.131              | 0.046     | 0.04           | 0.04           | 0.04           | 0.006                   | 0.006                     | 0.006              | 0.000                | 0.229       | 0.000       | 0.743   | 0.688               |      |
| GSM1902182   | 0.049         | 0.049          | 0.001        | 0.069             | 0.099                      | 0.112                         | 0.015                          | 0.019                      | 0.062               | 0.053            | 0.228              | 0.035     | 0.04           | 0.04           | 0.04           | 0.003                   | 0.003                     | 0.019              | 0.000                | 0.229       | 0.000       | 0.743   | 0.688               |      |
| GSM1902183   | 0.038         | 0.038          | 0.001        | 0.092             | 0.099                      | 0.06                          | 0.029                          | 0.019                      | 0.014               | 0.064            | 0.013              | 0.225     | 0.04           | 0.04           | 0.04           | 0.008                   | 0.008                     | 0.005              | 0.000                | 0.242       | 0.000       | 0.690   | 0.731               |      |
| GSM1902184   | 0.007         | 0.007          | 0.001        | 0.183             | 0.015                      | 0.039                         | 0.019                          | 0.073                      | 0.121               | 0.077            | 0.226              | 0.023     | 0.04           | 0.04           | 0.04           | 0.007                   | 0.007                     | 0.007              | 0.000                | 0.23        | 0.000       | 0.704   | 0.714               |      |
| GSM1902185   | 0.008         | 0.008          | 0.001        | 0.166             | 0.072                      | 0.079                         | 0.076                          | 0.01                       | 0.025               | 0.205            | 0.214              | 0.015     | 0.04           | 0.04           | 0.04           | 0.008                   | 0.008                     | 0.013              | 0.000                | 0.187       | 0.000       | 0.705   | 0.717               |      |
| GSM1902186   | 0.024         | 0.024          | 0.001        | 0.113             | 0.015                      | 0.123                         | 0.061                          | 0.02                       | 0.005               | 0.11             | 0.055              | 0.257     | 0.055          | 0.04           | 0.04           | 0.002                   | 0.002                     | 0.029              | 0.000                | 0.15        | 0.000       | 0.735   | 0.701               |      |
| GSM1902187   | 0.003         | 0.03           | 0.001        | 0.077             | 0.015                      | 0.139                         | 0.043                          | 0.035                      | 0.03                | 0.028            | 0.119              | 0.187     | 0.017          | 0.04           | 0.04           | 0.001                   | 0.001                     | 0.011              | 0.000                | 0.251       | 0.000       | 0.699   | 0.723               |      |
| GSM1902188   | 0.026         | 0.026          | 0.001        | 0.236             | 0.021                      | 0.074                         | 0.012                          | 0.012                      | 0.084               | 0.176            | 0.012              | 0.04      | 0.04           | 0.04           | 0.04           | 0.003                   | 0.003                     | 0.016              | 0.000                | 0.161       | 0.000       | 0.723   | 0.699               |      |
| GSM1902189   | 0.001         | 0.036          | 0.001        | 0.166             | 0.132                      | 0.006                         | 0.056                          | 0.033                      | 0.076               | 0.018            | 0.207              | 0.026     | 0.04           | 0.04           | 0.04           | 0.022                   | 0.022                     | 0.016              | 0.000                | 0.223       | 0.000       | 0.694   | 0.729               |      |
| GSM1902190   | 0.034         | 0.034          | 0.001        | 0.098             | 0.014                      | 0.008                         | 0.044                          | 0.011                      | 0.133               | 0.174            | 0.154              | 0.011     | 0.04           | 0.04           | 0.04           | 0.002                   | 0.002                     | 0.003              | 0.000                | 0.205       | 0.000       | 0.753   | 0.666               |      |
| GSM1902191   | 0.005         | 0.028          | 0.001        | 0.132             | 0.124                      | 0.083                         | 0.042                          | 0.021                      | 0.049               | 0.03             | 0.018              | 0.212     | 0.014          | 0.04           | 0.04           | 0.005                   | 0.005                     | 0.005              | 0.000                | 0.234       | 0.000       | 0.730   | 0.697               |      |
| GSM1902192   | 0.001         | 0.027          | 0.001        | 0.059             | 0.089                      | 0.11                          | 0.033                          | 0.007                      | 0.066               | 0.037            | 0.253              | 0.014     | 0.04           | 0.04           | 0.04           | 0.006                   | 0.006                     | 0.035              | 0.000                | 0.254       | 0.000       | 0.544   | 0.841               |      |
| GSM1902193   | 0.017         | 0.017          | 0.001        | 0.107             | 0.058                      | 0.059                         | 0.043                          | 0.074                      | 0.011               | 0.029            | 0.022              | 0.02      | 0.04           | 0.04           | 0.04           | 0.023                   | 0.023                     | 0.026              | 0.000                | 0.233       | 0.000       | 0.762   | 0.656               |      |
| GSM1902194   | 0.022         | 0.022          | 0.001        | 0.074             | 0.07                       | 0.126                         | 0.007                          | 0.02                       | 0.057               | 0.016            | 0.221              | 0.059     | 0.04           | 0.04           | 0.04           | 0.008                   | 0.008                     | 0.05               | 0.000                | 0.268       | 0.000       | 0.739   | 0.679               |      |
| GSM1902195   | 0.019         | 0.019          | 0.001        | 0.127             | 0.12                       | 0.131                         | 0.046                          | 0.03                       | 0.034               | 0.037            | 0.246              | 0.006     | 0.04           | 0.04           | 0.04           | 0.014                   | 0.014                     | 0.018              | 0.000                | 0.171       | 0.000       | 0.710   | 0.720               |      |
| GSM1902196   | 0.004         | 0.022          | 0.001        | 0.15              | 0.093                      | 0.034                         | 0.034                          | 0.124                      | 0.025               | 0.111            | 0.198              | 0.014     | 0.04           | 0.04           | 0.04           | 0.008                   | 0.008                     | 0.002              | 0.000                | 0.218       | 0.000       | 0.751   | 0.674               |      |
| GSM1902197   | 0.051         | 0.051          | 0.001        | 0.171             | 0.09                       | 0.041                         | 0.012                          | 0.033                      | 0.078               | 0.069            | 0.055              | 0.232     | 0.04           | 0.04           | 0.04           | 0.002                   | 0.002                     | 0.014              | 0.000                | 0.147       | 0.000       | 0.726   | 0.704               |      |
| GSM1902198   | 0.036         | 0.036          | 0.001        | 0.129             | 0.08                       | 0.05                          | 0.002                          | 0.055                      | 0.039               | 0.021            | 0.111              | 0.2       | 0.016          | 0.04           | 0.04           | 0.037                   | 0.037                     | 0.007              | 0.000                | 0.225       | 0.000       | 0.708   | 0.717               |      |
| GSM1902199   | 0.092         | 0.092          | 0.001        | 0.14              | 0.044                      | 0.102                         | 0.028                          | 0.04                       | 0.047               | 0.077            | 0.213              | 0.006     | 0.04           | 0.04           | 0.04           | 0.0                     |                           |                    |                      |             |             |         |                     |      |

| Input Sample | B cells naive | B cells memory | Plasma cells | T cells CD4 |       | T cells CD4 memory resting | T cells CD4 memory activated | T cells CD4 T cells follicular helper | T cells regulatory (Tregs) | T cells gamma delta | NK cells resting | NK cells activated | Monocytes MO | Macrophages |   |       | Dendritic cells resting | Dendritic cells activated | Mast cells resting | Mast cells activated | Eosinophils | Neutrophils | P-value | Pearson Correlation | RMSE  |
|--------------|---------------|----------------|--------------|-------------|-------|----------------------------|------------------------------|---------------------------------------|----------------------------|---------------------|------------------|--------------------|--------------|-------------|---|-------|-------------------------|---------------------------|--------------------|----------------------|-------------|-------------|---------|---------------------|-------|
|              |               |                |              | M0          | M1    |                            |                              |                                       |                            |                     |                  |                    |              | M2          |   |       |                         |                           |                    |                      |             |             |         |                     |       |
| GSM1902175   | 0.001         | 0.029          | 0            | 0.123       | 0.187 | 0.116                      | 0                            | 0                                     | 0.06                       | 0                   | 0.005            | 0.058              | 0.175        | 0.013       | 0 | 0     | 0                       | 0.003                     | 0                  | 0.03                 | 0           | 0.2         | 0.000   | 0.720               | 0.709 |
| GSM1902176   | 0.013         | 0.044          | 0            | 0.08        | 0.059 | 0.124                      | 0.01                         | 0                                     | 0.06                       | 0.007               | 0.081            | 0.083              | 0.215        | 0.017       | 0 | 0     | 0                       | 0.01                      | 0                  | 0.007                | 0           | 0.191       | 0.000   | 0.698               | 0.727 |
| GSM1902177   | 0.006         | 0.018          | 0            | 0.108       | 0.087 | 0                          | 0.032                        | 0                                     | 0.02                       | 0                   | 0.075            | 0                  | 0.262        | 0.041       | 0 | 0     | 0                       | 0.005                     | 0                  | 0.007                | 0           | 0.177       | 0.000   | 0.663               | 0.751 |
| GSM1902178   | 0             | 0.015          | 0            | 0.08        | 0.082 | 0.152                      | 0                            | 0                                     | 0.047                      | 0                   | 0.044            | 0.038              | 0.236        | 0.051       | 0 | 0.003 | 0                       | 0                         | 0.014              | 0                    | 0.239       | 0.000       | 0.715   | 0.709               |       |
| GSM1902179   | 0             | 0.022          | 0            | 0.136       | 0.075 | 0.059                      | 0.092                        | 0                                     | 0.038                      | 0                   | 0.182            | 0.013              | 0.132        | 0.057       | 0 | 0     | 0                       | 0.003                     | 0.005              | 0                    | 0           | 0.224       | 0.000   | 0.703               | 0.721 |
| GSM1902180   | 0.012         | 0.006          | 0            | 0.049       | 0.115 | 0.071                      | 0.062                        | 0                                     | 0.038                      | 0                   | 0.042            | 0.011              | 0.252        | 0.012       | 0 | 0     | 0                       | 0.017                     | 0                  | 0.059                | 0           | 0.177       | 0.000   | 0.736               | 0.684 |
| GSM1902181   | 0             | 0.031          | 0            | 0.092       | 0.11  | 0.099                      | 0.02                         | 0                                     | 0                          | 0.088               | 0.002            | 0                  | 0.233        | 0.016       | 0 | 0     | 0                       | 0.024                     | 0.003              | 0                    | 0           | 0.201       | 0.000   | 0.715               | 0.704 |
