# Supplementary material for: Identification of immune related cells and crucial genes in the peripheral blood of ankylosing spondylitis by integrated bioinformatics analysis
Source: PeerJ. 2021 Sep 7;9:e12125. doi: 10.7717/peerj.12125 (PMC8432305; doi:10.7717/peerj.12125)
Supplement: Supplemental Information 11 [file peerj-09-12125-s011.xlsx]

## Sheet: Supplementary file 8-All signif
ID	Description	GeneRatio	BgRatio	pvalue	p.adjust	qvalue	geneID	Count
hsa04145	Phagosome	14/148	152/8042	6.78778e-07	0.000147295	0.000132183		14
hsa05140	Leishmaniasis	9/148	77/8042	1.05527e-05	0.00114497	0.0010275		9
hsa04640	Hematopoietic cell lineage	9/148	99/8042	8.03139e-05	0.00580937	0.00521336		9
hsa04650	Natural killer cell mediated cytotoxicity	10/148	131/8042	0.000141537	0.00767839	0.00689063		10
hsa04613	Neutrophil extracellular trap formation	12/148	190/8042	0.000188532	0.00818229	0.00734283		12
hsa04217	Necroptosis	10/148	159/8042	0.000675093	0.0244159	0.0219109		10
hsa04210	Apoptosis	9/148	136/8042	0.000872898	0.0270598	0.0242836		9
hsa04658	Th1 and Th2 cell differentiation	7/148	92/8042	0.00147254	0.0399426	0.0358446		7
